# Supplementary material for: Nanoencapsulation as a General Solution for Lyophilization of Labile Substrates
Source: MDPI journal article supplement (doi:10.3390/pharmaceutics13111790), 2021-10-26
Supplement: s1 [file s1]

# Supplementary Materials: Nanoencapsulation as a General Solution for Lyophilization of Labile Substrates

Girish Vallerinteavide Mavelli, Samira Sadeghi, Siddhesh Sujit Vaidya, Shik Nie Kong and Chester Lee Drum

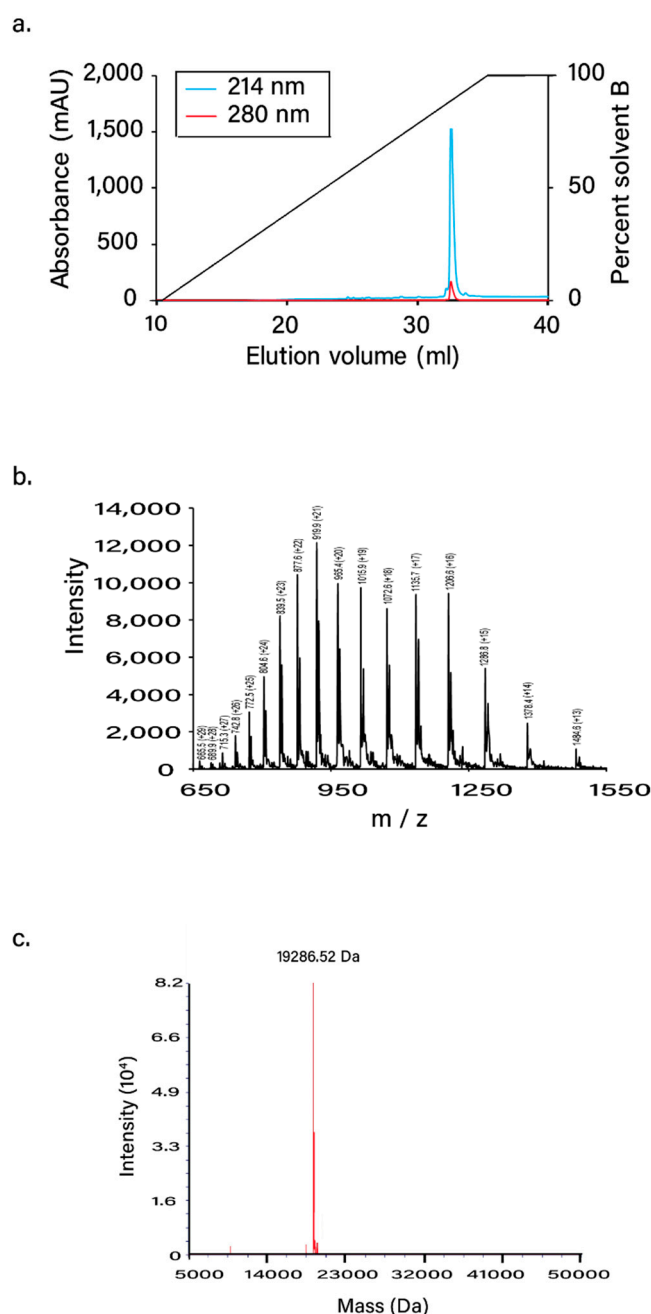

**Figure S1.** Re-purification of tES. **(a)** RP-HPLC chromatography of SEC purified tES on a linear gradient of 0–100% solvent B. The elution was monitored at 215 and 280 nm. **(b)** The ESI-MS of tES showing multiple peaks of mass/charge ( $m/z$ ) ratio ranging from +13 to +29 charges. **(c)** The mass of tES was determined to be 19286.52 Da.

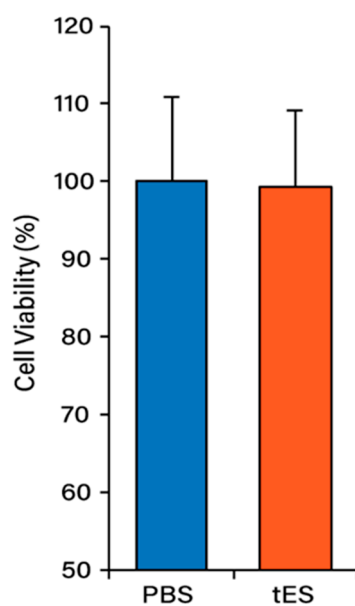

**Figure S2.** Effect of tES on cell viability.

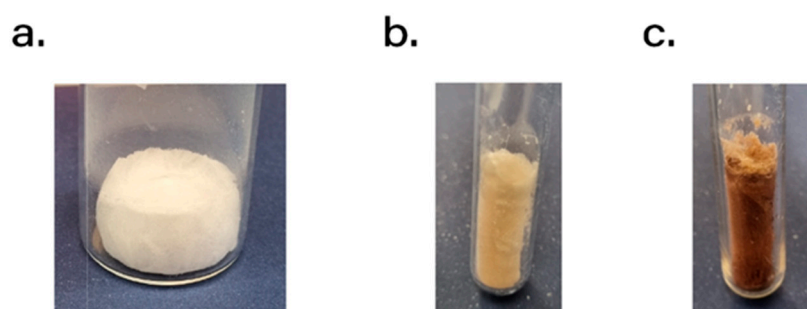

**Figure S3.** Cake appearance of freeze-dried proteins. (a) tES, (b) tES - HRP, (c) HRP.

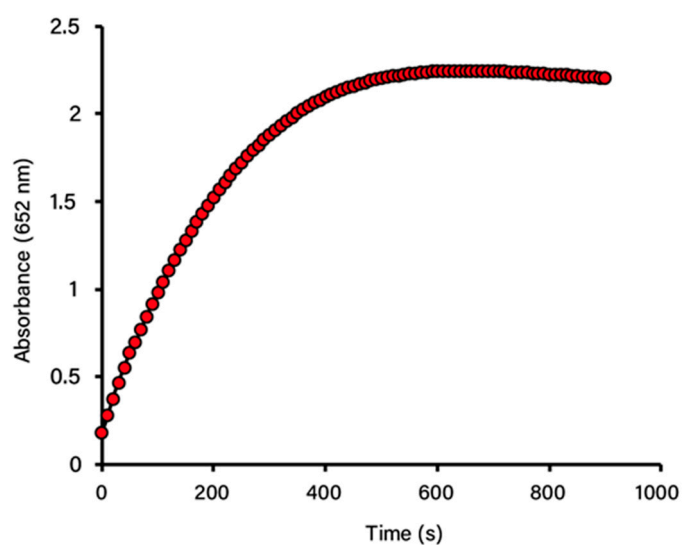

**Figure S4.** Time-dependent activity of freeze-dried tES-HRP assayed at 652 nm.

**Table S1.** Average reads and standard deviations for HRP activity from three independent experiments.

|                     | Reads Average    | STDEV | Reads Average | STDEV                  | Reads Average | STDEV |
|---------------------|------------------|-------|---------------|------------------------|---------------|-------|
|                     | <b>One Week</b>  |       |               |                        |               |       |
|                     | RT               |       | 4 °C          |                        | -20 °C        |       |
| Lyophilized HRP     | 0.54             | 0.17  | 0.65          | 0.08                   | 0.75          | 0.08  |
| Lyophilized tES-HRP | 3.92             | 0.27  | 5.53          | 0.18                   | 5.22          | 0.13  |
|                     | <b>One Month</b> |       |               |                        |               |       |
|                     | RT               |       | 4 °C          |                        | -20 °C        |       |
| Lyophilized HRP     | 0.33             | 0.02  | 0.16          | 0.02                   | 0.68          | 0.02  |
| Lyophilized tES-HRP | 3.71             | 0.01  | 3.74          | 0.01                   | 3.79          | 0.01  |
|                     | <b>One Day</b>   |       |               | <b>Pre-Lyophilized</b> |               |       |
| Lyophilized HRP     | 3.61             | 0.04  |               | HRP                    | 5.55          | 0.33  |
| Lyophilized tES-HRP | 5.23             | 0.11  |               | tES                    | 5.72          | 0.15  |
